# Supplementary material
Source: PubMed Central journal article supplement (PMC3934829)

Liu, Y. et al., Figure S1

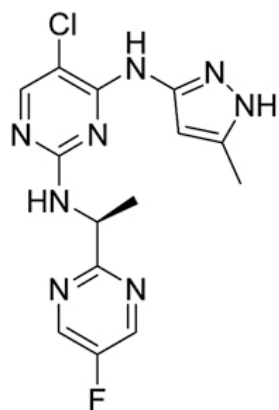

$C_{14}H_{14}ClFN_8$   
Mol. Wt.: 348.77

**A.**

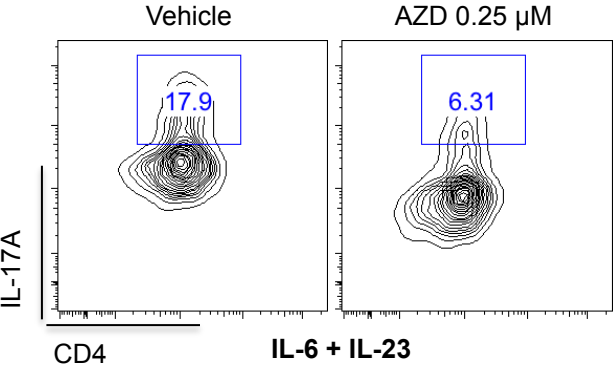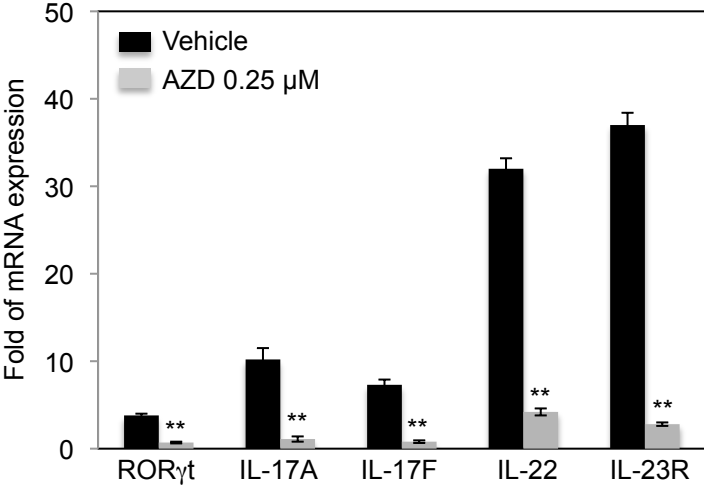

**B.**

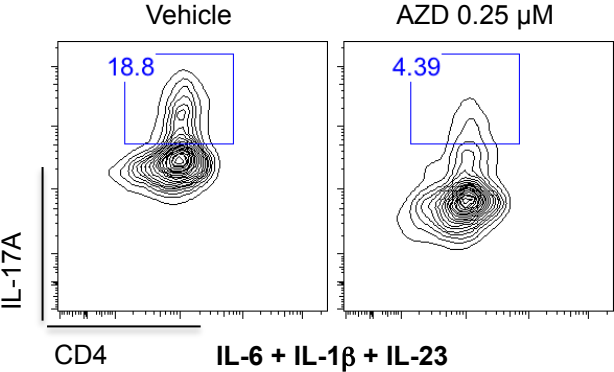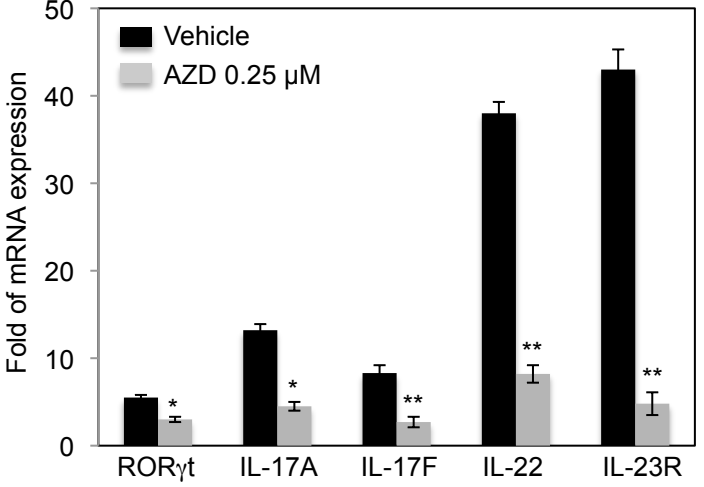

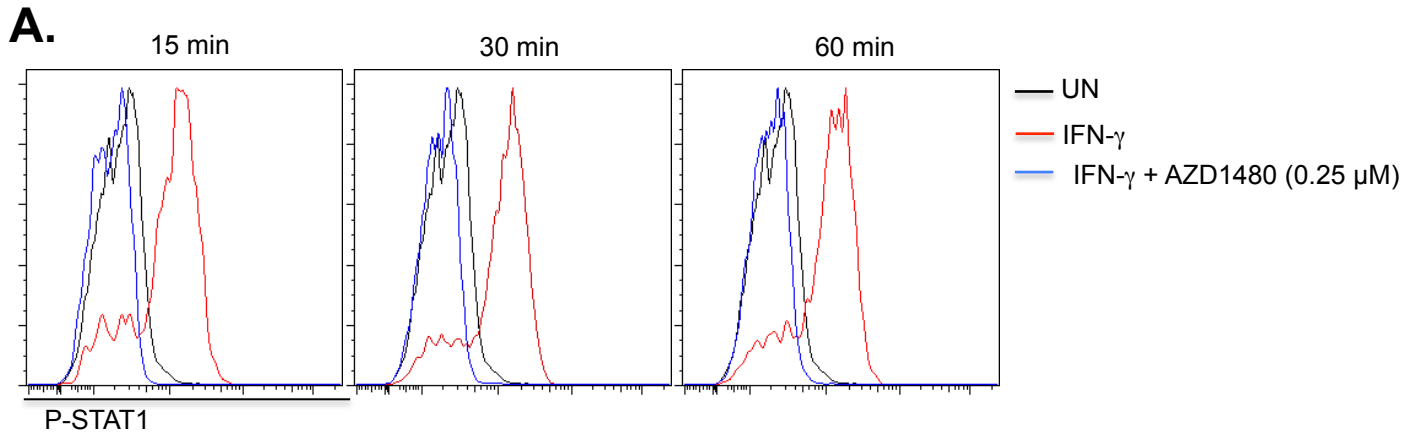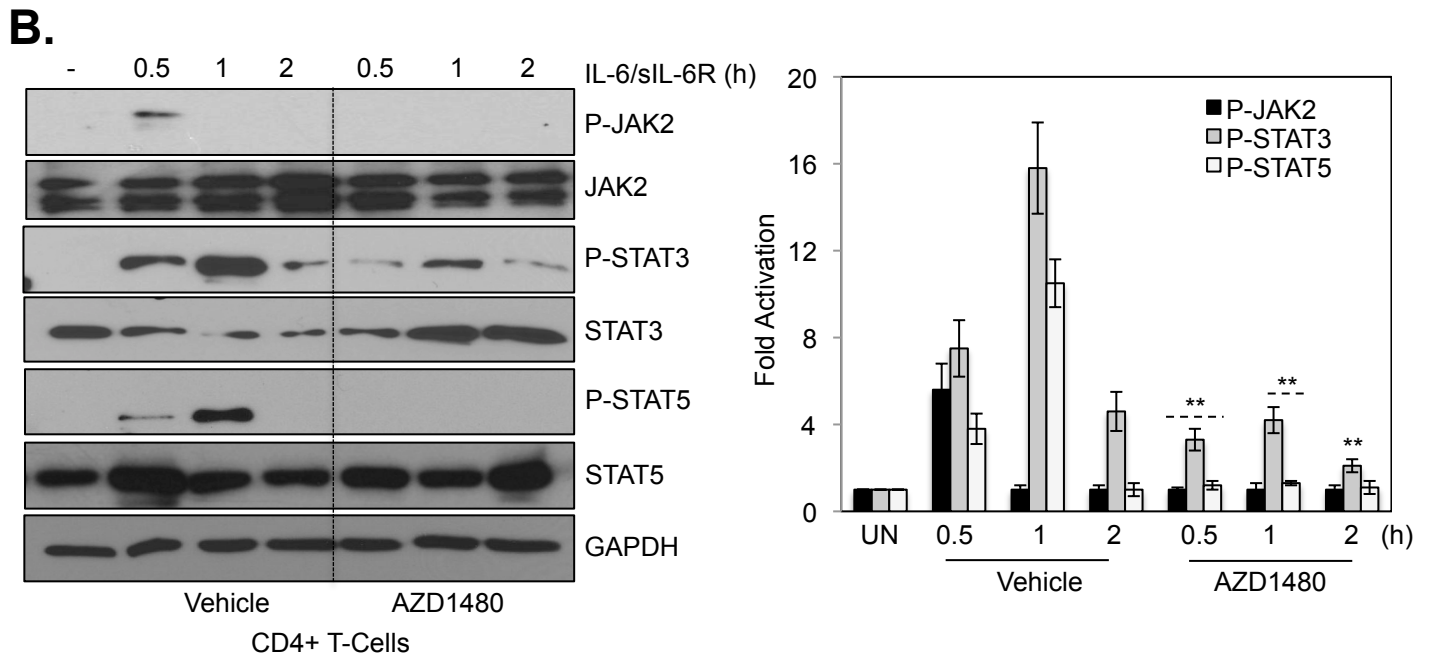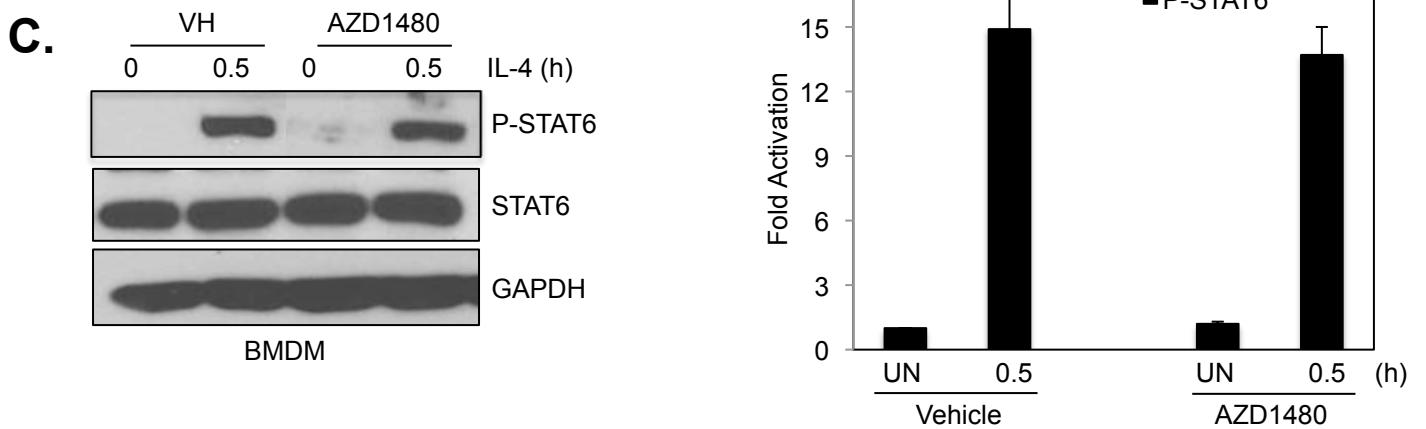

Liu, Y. et al., Figure S4

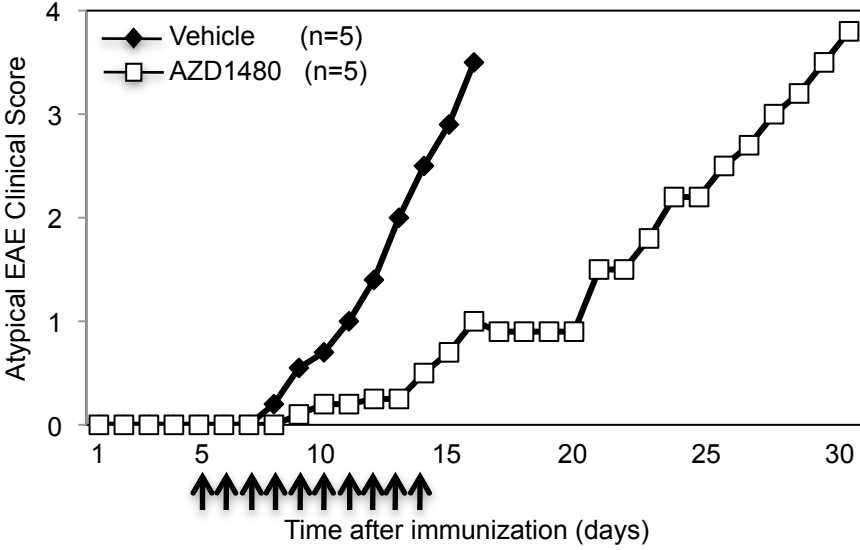

Supplement: NIHMS535914-supplement-2.pdf [file NIHMS535914-supplement-2.pdf]
